# Supplementary material for: Ion mobility coupled to native mass spectrometry as a relevant tool to investigate extremely small ligand-induced conformational changes
Source: Royal Society of Chemistry journal article supplement (doi:10.1039/c5an01311a), 2015-01-01
Supplement: c5an01311a1.pdf [file c5an01311a1.pdf]

## **Ion mobility coupled to native mass spectrometry as a relevant tool to investigate ligand-induced small conformational changes**

Johann Stojko,<sup>a,b</sup> Sonia Fieulaine,<sup>c</sup> Stéphanie Petiot-Bécard,<sup>a,b</sup> Alain Van Dorsselaer,<sup>a,b</sup> Thierry Meinneel,<sup>c</sup> Carmela Giglione,<sup>c\*</sup> Sarah Cianférani<sup>a,b\*</sup>

<sup>a</sup>BioOrganic Mass Spectrometry Laboratory (LSMBO), IPHC, Université de Strasbourg, 25 rue Becquerel, 67087 Strasbourg, France.

<sup>b</sup>IPHC, CNRS, UMR7178, 67087 Strasbourg, France.

<sup>c</sup>Institute for Integrative Biology of the Cell (I2BC), CEA, CNRS, Université Paris-Sud, 1 avenue de la Terrasse, F-91198 Gif-sur-Yvette cedex, France.

\*Corresponding authors:

Dr Sarah Cianférani, phone: +33 (0)3 68 85 26 79, fax: +33 (0)3 68 85 27 81, e-mail:

sarah.cianferani@unistra.fr;

Dr. Carmela Giglione, phone: +33(0)1 69 82 35 97, e-mail: carmela.giglione@i2bc.paris-saclay.fr;

The electronic supplementary material file "Stojko et al SI.docx" contains six figures:

Denatured and native mass spectra of *apo*PDF1B (Fig. S1); Effects of ligand concentration and incubation time on individual PDF1B:ligand native MS profiles (Fig. S2); Real-time native MS monitoring of indirect competition experiments initiated from 1:1 PDF1B:actinonin and PDF1B:*6b* complexes (Fig. S3); Relative proportions of different species during indirect competition experiments initiated from 1:1 PDF1B:actinonin and PDF1B:*6b* complexes (Fig. S4); Comparison of the X-ray structures of *apo*- and *holo*PDF1B (Fig. S5); and collision-induced unfolding fingerprints analysis of different 1:1 PDF1B:ligand complexes (Fig. S6).

## Supplementary material

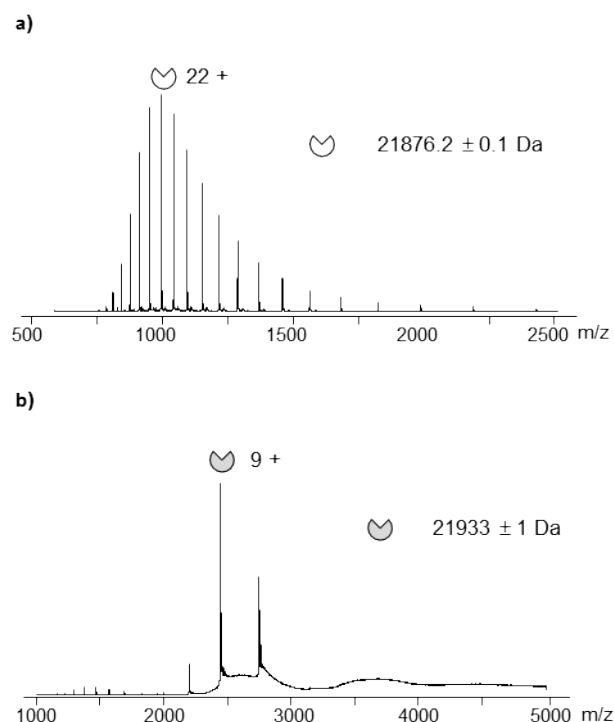

**Fig. S1** (a) Denatured and (b) native mass spectra of *apo*PDF1B.

For ESI-MS performed in classical denaturing conditions (2-5  $\mu$ M in a  $\text{H}_2\text{O}/\text{CH}_3\text{CN}$  – 1/1 – mixture acidified with 1%  $\text{HCOOH}$ ), noncovalent interactions between PDF1B and the metal ion are disrupted. Proteins are denatured (which accounts for a broad charge state distribution with a high number of charges) and PDF1B mass is measured. In native conditions ( $\text{AcONH}_4$  100 mM pH 7.5), the quaternary structure of PDF1B along with the interaction with the metal ion are retained, which accounts for a narrow charge state distribution with fewer charges.

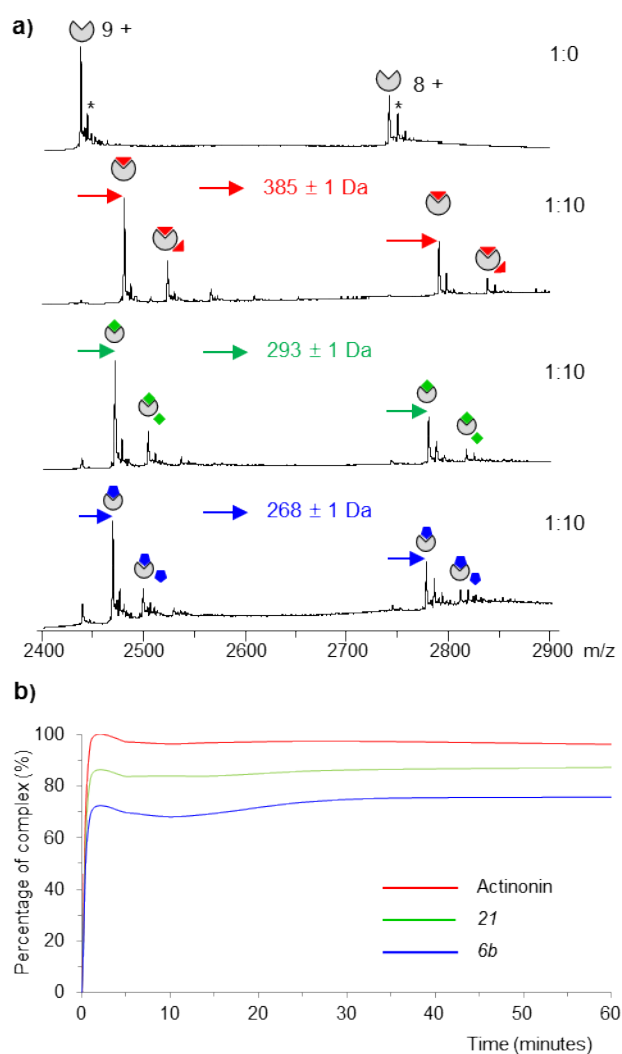

**Fig. S2** (a) Native mass spectrometry analysis of individual 1:10 PDF1B:ligand mixtures after 10 min incubation and (b) population of the 1:1 PDF1B:ligand complexes as a function of time in the three 1:2 mixtures.

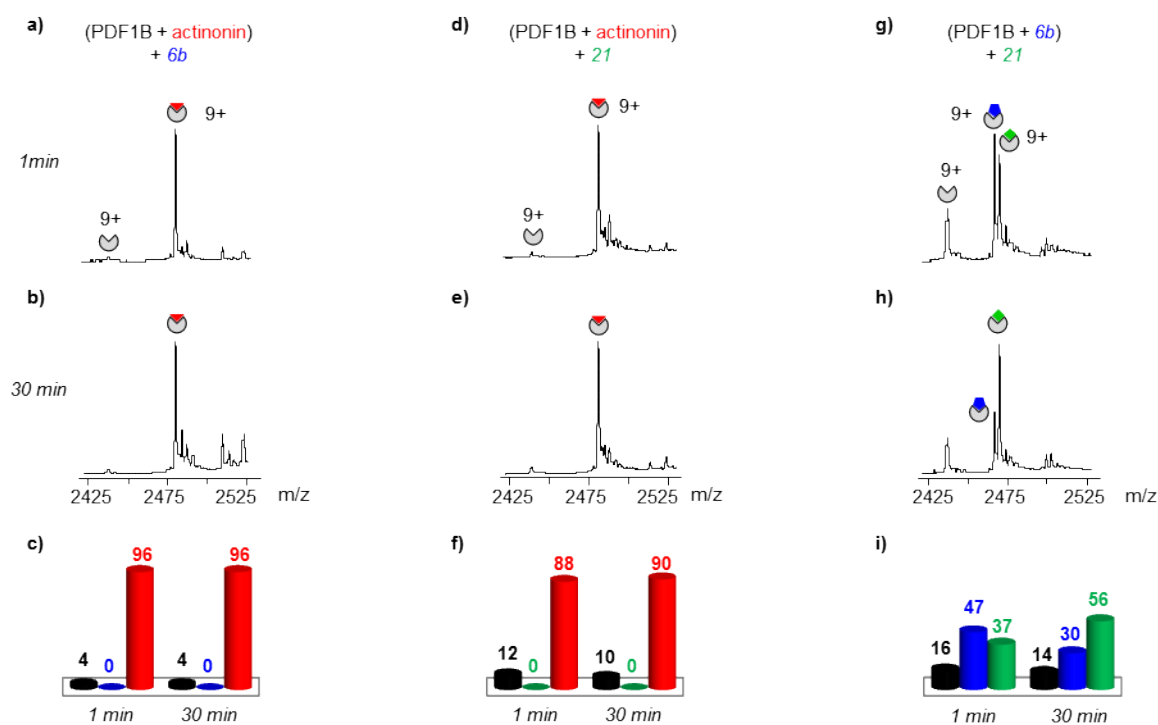

**Fig. S3** Indirect competition experiments monitored by real-time native mass spectrometry (MS). (a, b, d, e, g, h) Native mass spectra (9+ charge state) of PDF1B incubated with (a, b) actinonin and then compound 6b, (d, e) actinonin and then compound 21, and (g, h) 6b and then 21, (a, d, g) 1 min and (b, e, h) 30 min after adding the second ligand. Relative proportions, as determined by native MS, of the different species present 1 and 30 min after adding the second ligand in sequential incubations of (c) actinonin and then 6b, (f) actinonin and then 21, and (i) 6b and then 21.

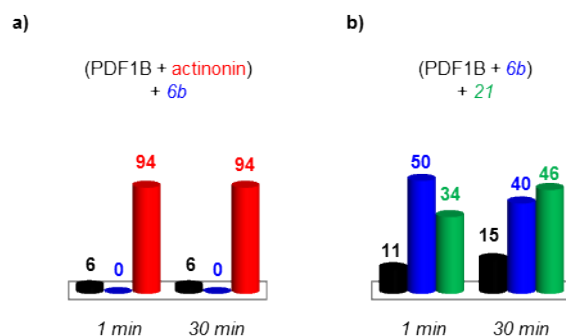

**Fig. S4** Indirect sequential competition experiments monitored by real-time ion-mobility mass spectrometry. Relative proportions, calculated from the arrival time distribution intensities of the 9+ and 8+ charge states, of apoPDF1B (black), PDF1B:actinonin (red), PDF1B:21 (green) and PDF1B:6b (blue) 1 and 30 min after adding the second ligand in sequential incubations of (a) actinonin and then 6b and (b) 6b and then 21.

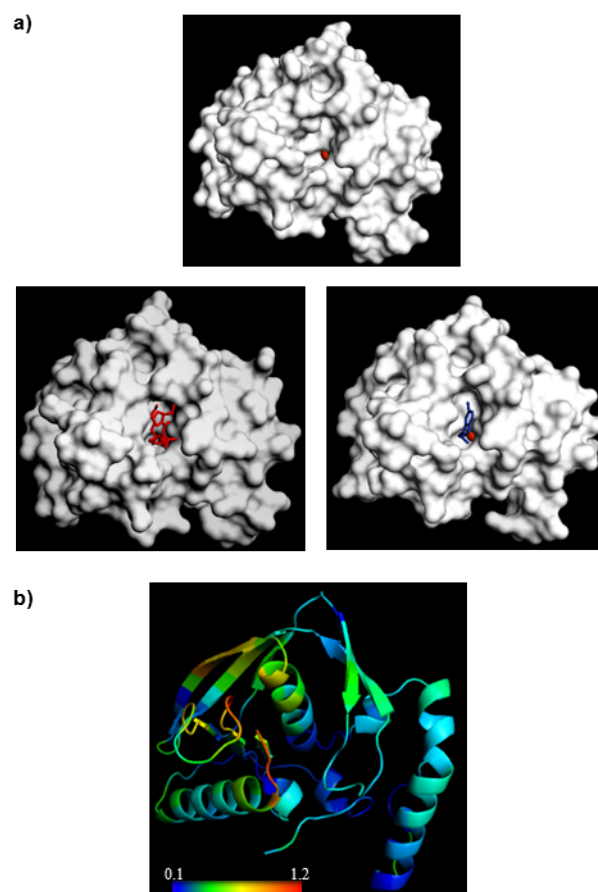

**Fig. S5** Comparison of the X-ray structures of *apo*PDF1B and crystallized 1:1 PDF1B:ligand complexes. (a) Pymol<sup>1</sup> representations of *apo*PDF1B (PDB: 3PN2, top), PDF1B:actinonin (PDB: 3M6P, bottom left) and PDF1B:6b (PDB: 3O3J, bottom right) in the same orientation. (b) *apo*PDF1B and PDF1B:actinonin structures aligned along the alpha carbons using the software VMD<sup>2</sup>. The color scheme indicates the deviation (in Å) between alpha carbons in the two structures.

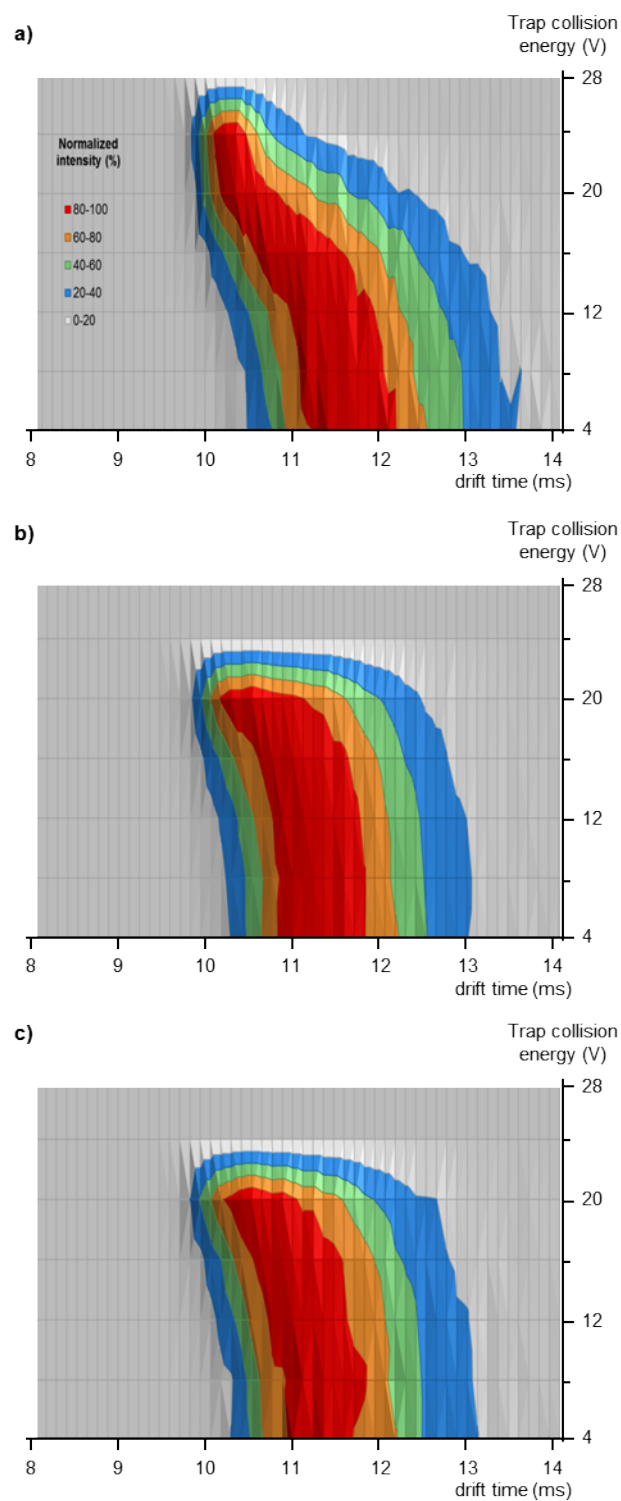

**Fig. S6** Collision induced unfolding fingerprints (arrival drift time distributions recorded at increasing trap collision energies) of the 9+ charge states associated with 1:1 complexes of (a) PDF1B:actinonin, (b) PDF1B:21 and (c) PDF1B:6b.

## References:

1. DeLano Scientific, San Carlos, CA, USA.
2. W. Humphrey, A. Dalke and K. Schulten, *J. Mol. Graph.*, 1996, **14**, 33-38.
